# Supplementary material
Source: Springer Nature journal article supplement (https://www.springermedizin.de/resource/supplementary/12891_2013_1916_MOESM1_ESM.pdf/9508800)
Supplement: MOESM1 [file 9508800]

## Enrollment

854 Questionnaires sent

Excluded (n= 317)

- ◆ Did not reply (n= 185)
- ◆ Not meeting inclusion criteria (n= 28)
- ◆ Declined to participate (n= 104)

Randomized (n= 537)

## Allocation

Allocated to TG1 (n= 282)

Allocated to TG2 (n= 255)

## 20 Week

Missing replies (n= 71)

Replied to questionnaires (n= 211).

Missing replies (n= 18)

Replied to questionnaires (n= 237).

## One Year

Missing replies (n= 45)

Replied to questionnaires (n= 166).

Missing replies (n= 79)

Replied to questionnaires (n= 158).
